# Supplementary material
Source: MDPI journal article supplement (https://www.mdpi.com/2079-6412/13/2/283)
Supplement: s1 [file s1]

Supporting Information

# Single-Layer MoS<sub>2</sub>: A Two-Dimensional Material with Negative Poisson's Ratio

Yucheng Zhu <sup>1</sup>, Xiaofei Cao <sup>1</sup>, Yuan Tan <sup>1</sup>, Yao Wang <sup>2</sup>, Jun Hu <sup>1,\*</sup>, Baotong Li <sup>3</sup> and Zhong Chen <sup>4</sup>

<sup>1</sup> School of Chemical Engineering, Northwest University, Xi'an 710069, China

<sup>2</sup> Engineering Research Center of Alternative Energy Materials and Devices, Ministry of Education, Sichuan University, Chengdu 610065, China; wangyao516@scu.edu.cn

<sup>3</sup> Key Laboratory of Education Ministry for Modern Design and Rotor-Bearing System, Xi'an Jiaotong University, Xi'an 710049, China

<sup>4</sup> School of Materials Science and Engineering, Nanyang Technological University, Singapore 639798, Singapore

\* Correspondence: hujun@nwu.edu.cn

**Table S1.** The calculated elastic constants (units of GPa) of 2D MoS<sub>2</sub> and MoTe<sub>2</sub>.

| 2D Materials                             | C <sub>11</sub> | C <sub>12</sub> | C <sub>22</sub> | C <sub>66</sub> |
|------------------------------------------|-----------------|-----------------|-----------------|-----------------|
| MoS <sub>2</sub> (P6 <sub>3</sub> /mmc)  | 176             | 44              | 176             | 66              |
| MoS <sub>2</sub> (R $\bar{3}$ m)         | 179.3           | -13.5           | 179.3           | 99.7            |
| MoS <sub>2</sub> (F $\bar{4}$ 3m)        | 119.4           | 53.2            | 112.6           | 33.1            |
| WS <sub>2</sub> (R $\bar{3}$ m)          | 194             | 43              | 194             | 76              |
| MoTe <sub>2</sub> (P6 <sub>3</sub> /mmc) | 106             | 26              | 106             | 40              |
| MoTe <sub>2</sub> (P6 <sub>3</sub> /mmc) | 108.6           | 30.4            | 108.6           | 38              |

**Citation:** Zhu, Y.; Cao, X.; Tan, Y.; Wang, Y.; Hu, J.; Li, B.; Chen, Z. Single-Layer MoS<sub>2</sub>: A Two-Dimensional Material with Negative Poisson's Ratio. *Coatings* **2023**, *13*, 283. <https://doi.org/10.3390/coatings13020283>

Academic Editors: Emerson Coy and Andrey V. Osipov

Received: 25 November 2022

Revised: 17 January 2023

Accepted: 20 January 2023

Published: 26 January 2023

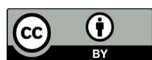

**Copyright:** © 2023 by the authors. Licensee MDPI, Basel, Switzerland. This article is an open access article distributed under the terms and conditions of the Creative Commons Attribution (CC BY) license (<https://creativecommons.org/licenses/by/4.0/>).

**Table S2.** Structural information of three configurations of MoS<sub>2</sub>.

|                                         | Lattice Parameters(Å) | Fractional Coordinates of Atoms |
|-----------------------------------------|-----------------------|---------------------------------|
| MoS <sub>2</sub> (P6 <sub>3</sub> /mmc) | a=3.190               | Mo1(0.6667 0.3333 0.75)         |
|                                         | b=3.190               | Mo2(0.3333 0.6667 0.25)         |
|                                         | c=14.879              | S1(0.3333 0.6667 0.8552)        |
|                                         |                       | S2(0.6667 0.3333 0.3552)        |
|                                         |                       | S3(0.3333 0.6667 0.6448)        |
|                                         |                       | S4(0.6667 0.3333 0.1448)        |
| MoS <sub>2</sub> (R $\bar{3}$ m)        | a=3.190               | Mo1(0 0 0)                      |
|                                         | b=3.190               | Mo2(0.6667 0.3333 0.3333)       |
|                                         | c=18.976              | Mo3(0.3333 0.6667 0.6667)       |
|                                         |                       | S1(0 0 0.2488)                  |
|                                         |                       | S2(0.6667 0.3333 0.0845)        |
|                                         |                       | S3(0.6667 0.3333 0.5822)        |
|                                         |                       | S4(0.3333 0.6667 0.4178)        |
|                                         |                       | S5(0.3333 0.6667 0.9155)        |
| MoS <sub>2</sub> (F $\bar{4}$ 3m)       | a=6.788               | Mo1(0.4235 0.8588 0.8588)       |
|                                         | b=6.788               | Mo2(0.8588 0.8588 0.4235)       |
|                                         | c=6.788               | Mo3(0.8588 0.8588 0.8588)       |
|                                         |                       | Mo4(0.8588 0.4235 0.8588)       |
|                                         |                       | S1(0.1185 0.1185 0.1185)        |
|                                         |                       | S2(0.1185 0.6446 0.1185)        |
|                                         |                       | S3(0.1185 0.1185 0.6446)        |
|                                         |                       | S4(0.1553 0.6149 0.6149)        |
|                                         |                       | S5(0.6149 0.1553 0.6149)        |
|                                         |                       | S6(0.6149 0.6149 0.6149)        |
|                                         |                       | S7(0.6149 0.6149 0.1553)        |
|                                         |                       | S8(0.6446 0.1185 0.1185)        |
| WS <sub>2</sub> (R $\bar{3}$ m)         | a=3.19                | W1(0 0 0)                       |
|                                         | b=3.19                | S1(0.3333 0.6667 0.07)          |
|                                         | c=21.36               | S2(0 0 0.26)                    |

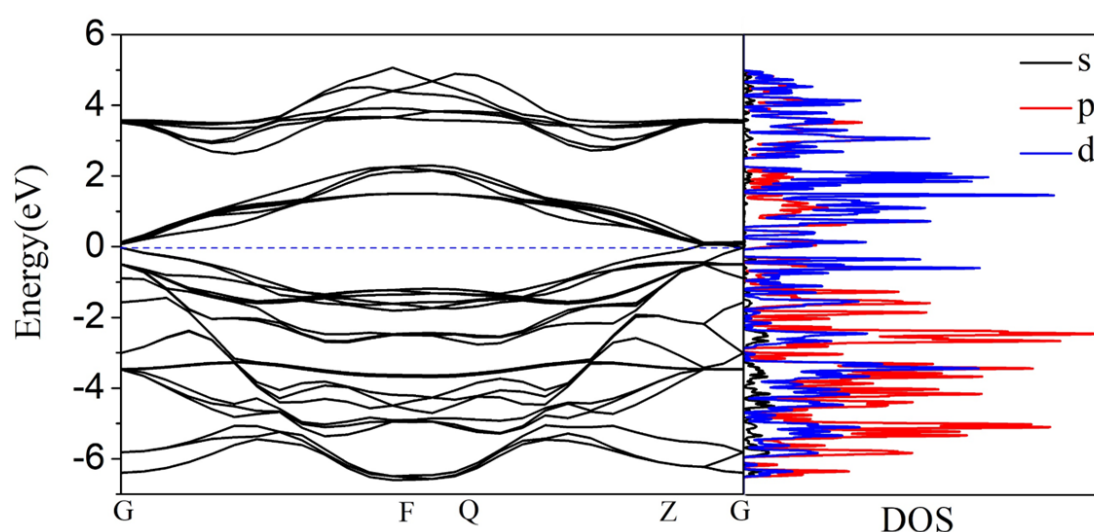**Figure S1.** The band structure and the DOS of MoS<sub>2</sub>. The energy band structure describes the energy that electrons are forbidden or allowed to carry, which is caused by the diffraction of quantum

dynamics electron waves in a periodic lattice. The energy band structure of a material determines various properties, especially its electronic and optical properties.

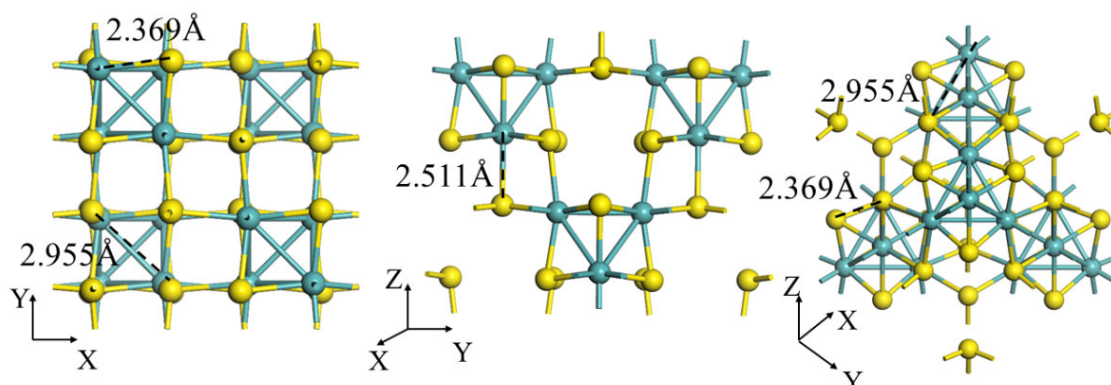

**Figure S2.** MoS<sub>2</sub> (space group  $F\bar{4}3m$ ).

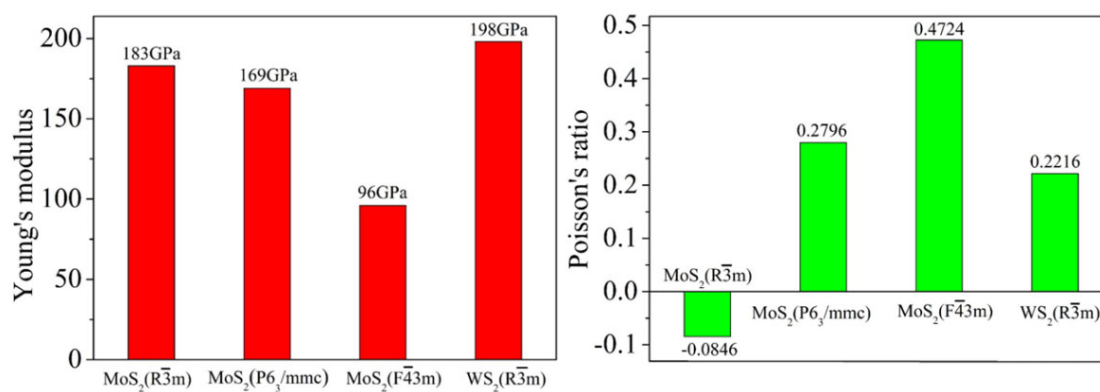

**Figure S3.** Comparison graphs of Young's modulus and Poisson's ratio for the four materials.

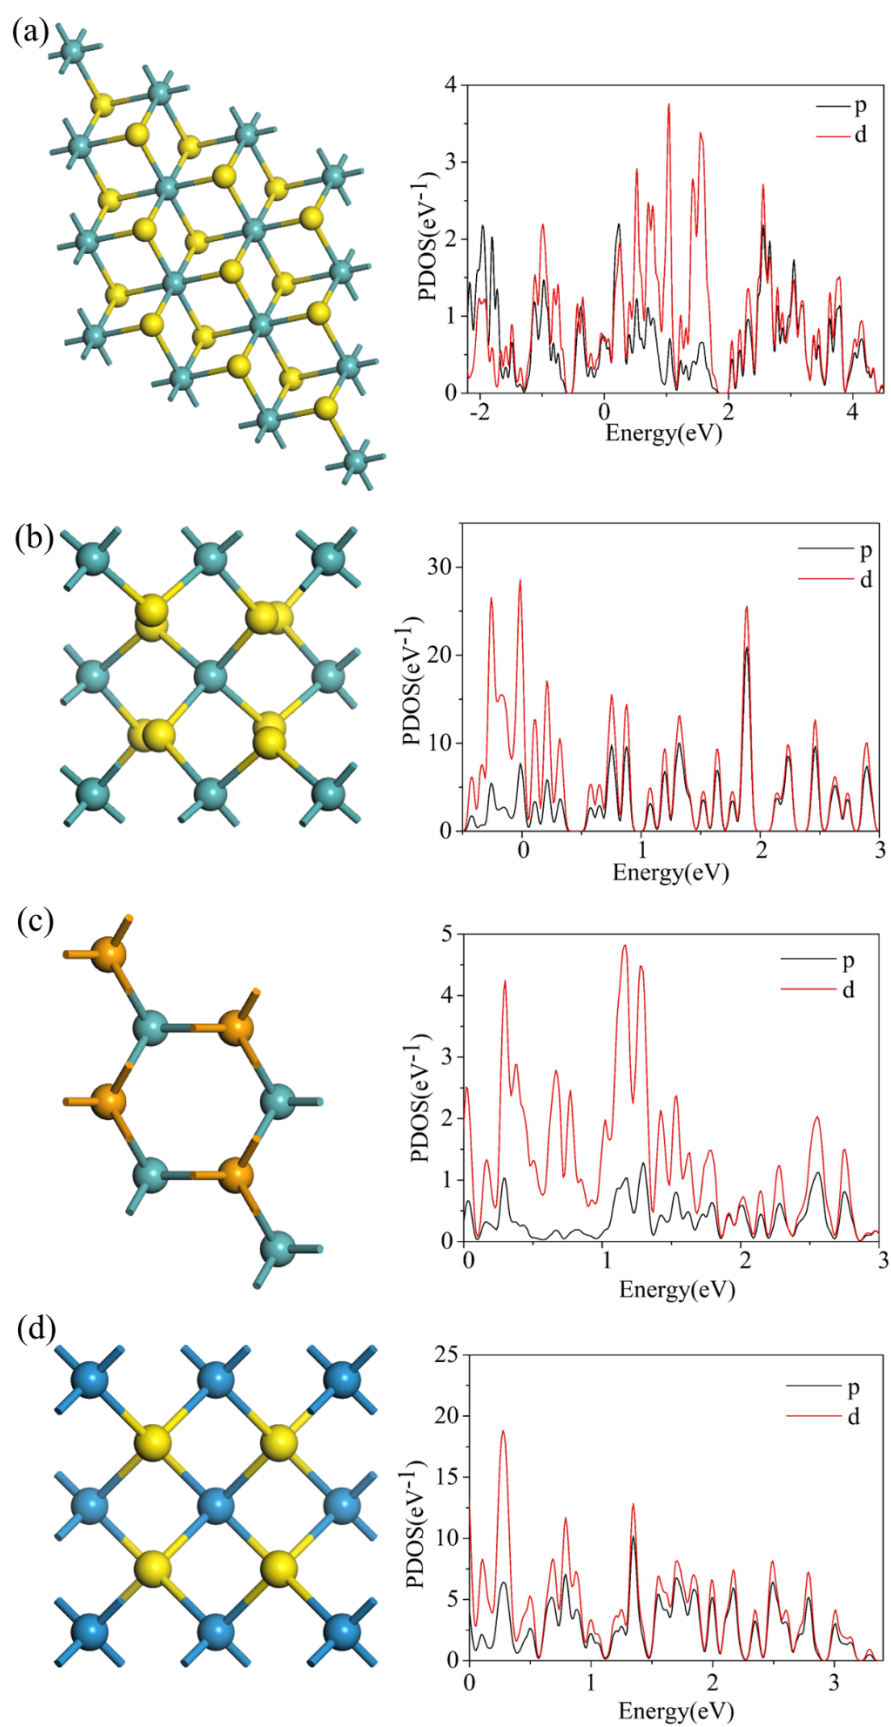

**Figure S4.** Four negative Poisson's ratio materials and their PDOS plots. (a)  $\text{MoS}_2$  (space group  $P\bar{3}m1$ ). (b)  $\text{MoS}_2$  (space group  $I\bar{4}2d$ ). (c)  $\text{MoSe}$  (space group  $P\bar{6}m2$ ). (d)  $\text{WS}_2$  (space group  $I\bar{4}2d$ ).

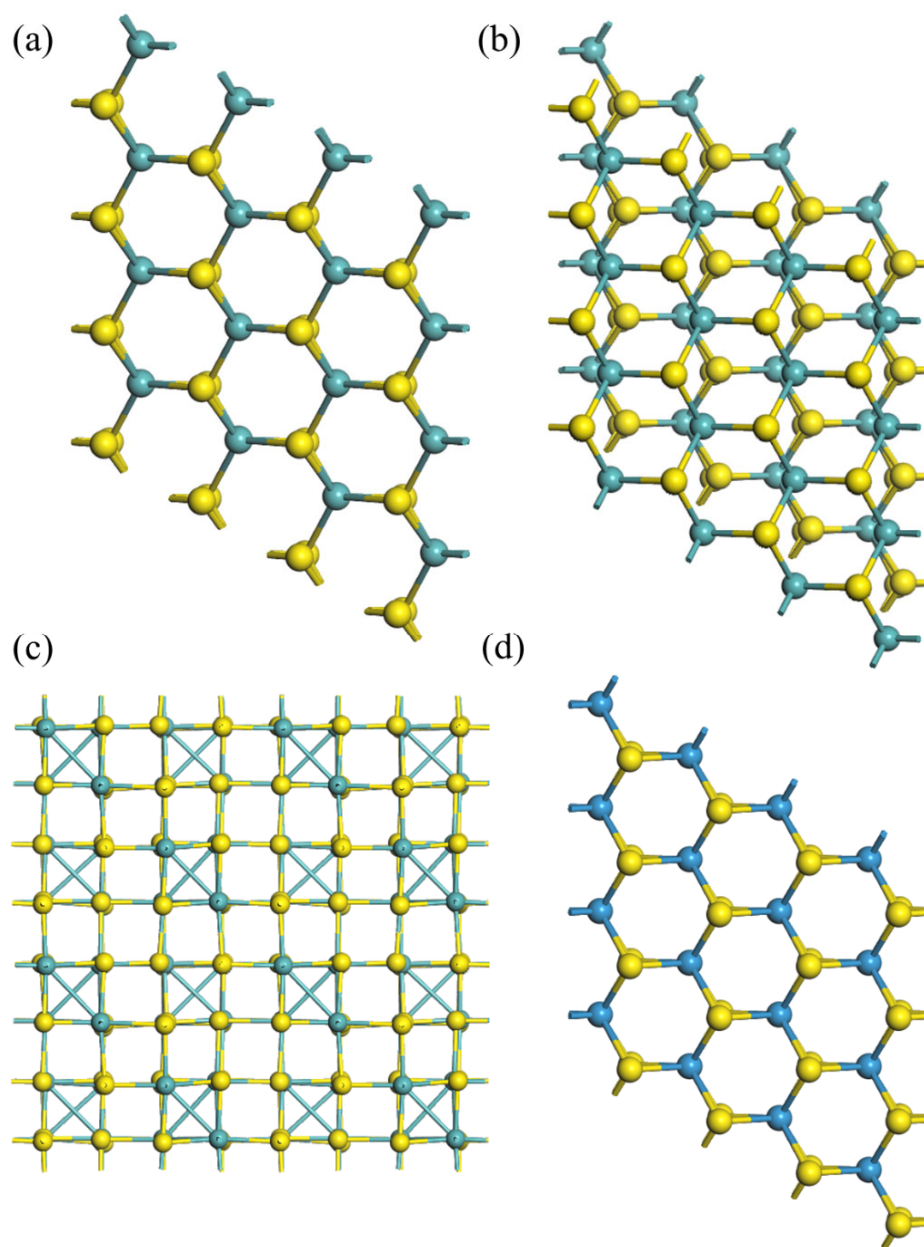

**Figure S5.** Structural snapshots (side view) of the (a) MoS<sub>2</sub> (space group  $R\bar{3}m$ ) (b) MoS<sub>2</sub> (space group  $P6_3/mmc$ ) (c) MoS<sub>2</sub> (space group  $F\bar{4}3m$ ) and (d) WS<sub>2</sub> (space group  $R\bar{3}m$ ) with the evolution of the average potential energy and temperature per atom in AIMD simulations at 500 K and 6 ps.
